# Supplementary material for: The use of methanol as a C1 building block
Source: Springer Nature journal article supplement (doi:10.1038/s41596-024-00978-0), 2024-04-25
Supplement: MOESM1 [file 41596_2024_978_MOESM1_ESM13.pdf]

# The use of methanol as a C1 building block

In the format provided by the  
authors and unedited

## The use of methanol as a C1 building block

Bhaskar Paul<sup>1, 2</sup>✉, and Sabuj Kundu<sup>2</sup>✉

<sup>1</sup>Department of Chemistry, University of Oxford, Oxford, UK. <sup>2</sup>Department of Chemistry, Indian Institute of Technology, Kanpur, India. ✉e-mail: paulbhaskar96@gmail.com (BP); sabuj@iitk.ac.in (SK).

**This PDF file includes:** Supplementary Methods, Supplementary Box, Supplementary References, and Supplementary Figures

## Supplementary Methods

## Contents:

1. N-Methylation of nitrobenzene in the presence of external substances.
2. Labelling experiment with  $\text{H}_2\text{O}^{18}$  for the conversion of benzonitrile to N-methyl benzamide.
3. Labelling experiment with methanol- $\text{d}_4$  for the conversion of benzonitrile to N-methyl benzamide.

### 1. N-Methylation of nitrobenzene in the presence of external substances.<sup>1</sup>

To an oven-dried pressure tube (9 mL), a magnetic stir-bar, nitro compound (0.5 mmol), external substance (0.5 mmol), NaOMe (0.5 mmol), Ru-1 (5 mol%), methanol (2.5 mL) and mesitylene (as internal standard) were added. Then, the pressure tube was sealed under an argon atmosphere and placed in a preheated oil bath at 110 °C (oil bath temperature) for 12 h. After that, the reaction mixture was cooled to room temperature, filtered through a small plug of silica, and analysed by GC to determine the conversion and selectivity.

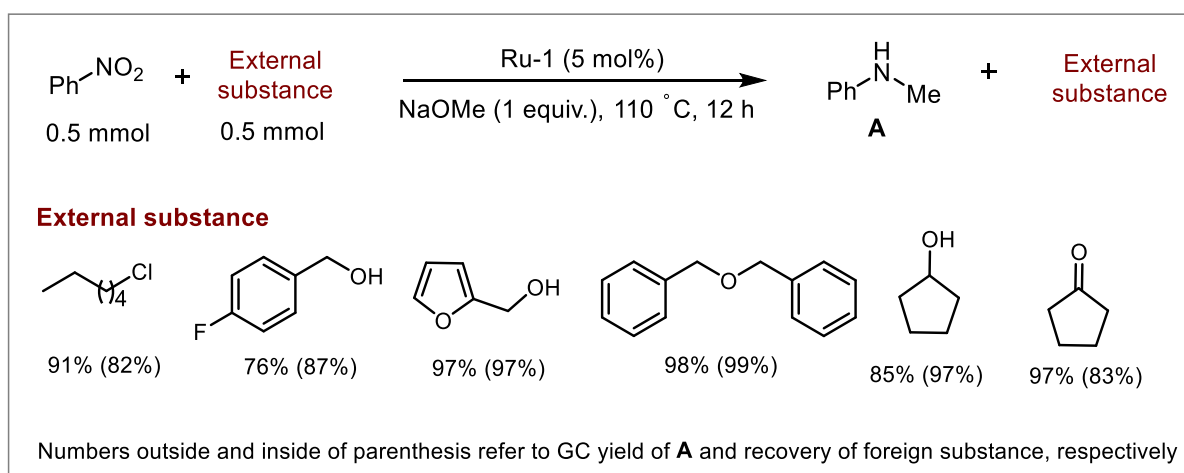

## 2. Labelling experiment with H<sub>2</sub>O<sup>18</sup> for the conversion of benzonitrile to N-methyl benzamide.<sup>2</sup>

Inside an argon-filled oven dried pressure tube (2.5 mL), benzonitrile (0.2 mmol), CoBr<sub>2</sub> (7.5 mol %), tris[2-(diphenylphosphino)ethyl]phosphine (PP<sub>3</sub>) ligand (7.5 mol %), Cs<sub>2</sub>CO<sub>3</sub> (0.2 mmol), KO<sup>t</sup>Bu (0.1 mmol), H<sub>2</sub>O<sup>18</sup> (2.0 mmol), and methanol/*m*-xylene (0.5 mL, 1:1 v/v) were added. Then, the pressure tube was sealed and placed in a preheated oil bath at 140 °C (oil bath temperature) for 3 h (nitrile hydration) and 24 h (nitrile hydration and methylation). The conversion and yield of the reactions were determined by GC analysis using mesitylene as an internal standard. The products were confirmed through the ESI-MS analysis.

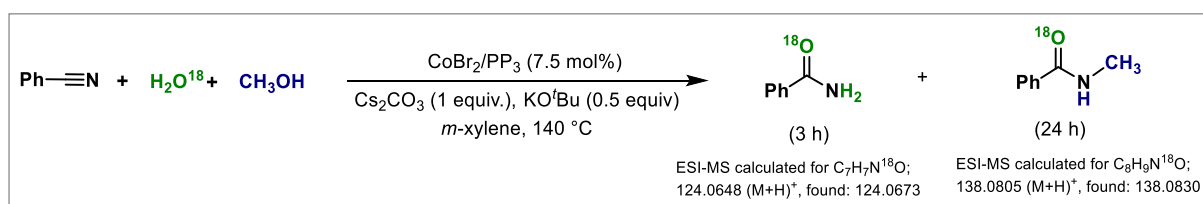

## 3. Labelling experiment with methanol-d<sub>4</sub> for the conversion of benzonitrile to N-methyl benzamide.<sup>2</sup>

Inside an argon-filled oven dried pressure tube (2.5 mL), benzonitrile (0.2 mmol), CoBr<sub>2</sub> (7.5 mol %), tris[2-(diphenylphosphino)ethyl]phosphine (PP<sub>3</sub>) ligand (7.5 mol %), Cs<sub>2</sub>CO<sub>3</sub> (0.2 mmol), KO<sup>t</sup>Bu (0.1 mmol), H<sub>2</sub>O (2.0 mmol), and methanol-d<sub>4</sub>/*m*-xylene (0.5 mL, 1:1 v/v) were added. Then, the pressure tube was sealed and placed in a preheated oil bath at 140 °C (oil bath temperature) for 40 h. The conversion of the reactions was determined by GC analysis using mesitylene as an internal standard. The products were confirmed through ESI-MS analysis.

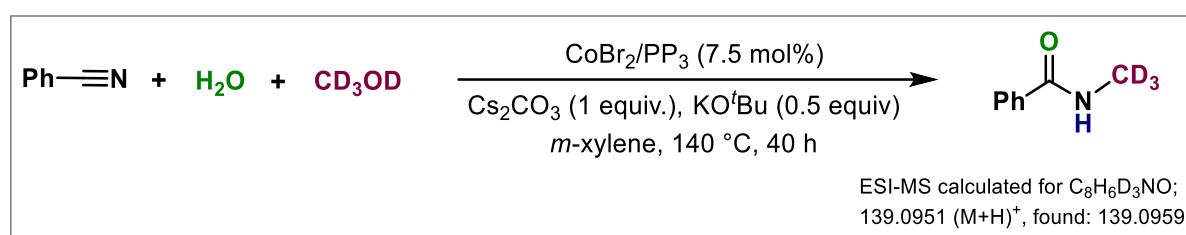

**Supplementary Box 1 | ‘Green Chemistry Metrics’ for N-methylation of 4-methoxybenzamide with di-*tert*-butyl peroxide.<sup>3</sup>**

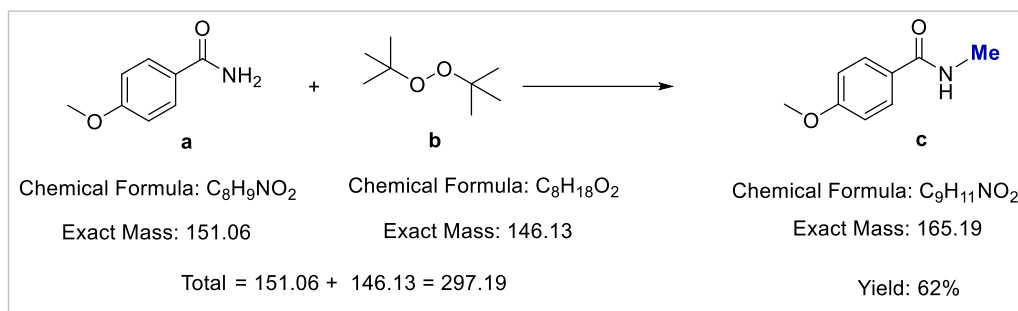

|                   |                                                       |          |           |
|-------------------|-------------------------------------------------------|----------|-----------|
| Reactant <b>a</b> | 4-methoxybenzamide                                    | 75.5 mg  | FW 151.06 |
| Reactant <b>b</b> | Me <sub>3</sub> CO-OCMe <sub>3</sub> (DTBP; 3 equiv.) | 219.2 mg | FW 146.13 |
| Solvent 1         | H <sub>2</sub> O                                      | 1000 mg  | FW 18.01  |
| Solvent 2         | HOAc                                                  | 1049 mg  | FW 60.05  |
| Product           | 4-methoxy-N-methylbenzamide                           | 51.2 mg  | FW 165.19 |

**E factor** = [(75.5 mg + 219.2 mg + 1000 mg + 1049 mg) - (51.2 mg)]/51.2 mg = [(2343.7 mg - 51.2 mg)/51.2 mg] = 2292.5 mg/51.2 mg = **44.77 kg waste/1 kg product**

**Atom economy** = (165.19/297.19) x 100 = **55.58%**

**Atom efficiency** = 62 x (55.58/100) = **34.46%**

**Carbon efficiency** = (9/16) x 100 = **56.25%**

**Reaction mass efficiency** = [51.2 mg / (75.5 mg + 73.06 mg)] x 100 = **34.46%**

**Supplementary References**

- 1 Paul, B., Shee, S., Chakrabarti, K. & Kundu, S. Tandem Transformation of Nitro Compounds into N-Methylated Amines: Greener Strategy for the Utilization of Methanol as a Methylating Agent. *ChemSusChem* **10**, 2370-2374 (2017).
- 2 Paul, B., Maji, M. & Kundu, S. Atom-Economical and Tandem Conversion of Nitriles to N-Methylated Amides Using Methanol and Water. *ACS Catal.* **9**, 10469-10476 (2019).
- 3 Li, Z.-I. & Cai, C. Pd/Ni catalyzed selective N-H/C-H methylation of amides by using peroxides as the methylating reagents via a radical process. *Org. Chem. Front.* **4**, 2207-2210 (2017).

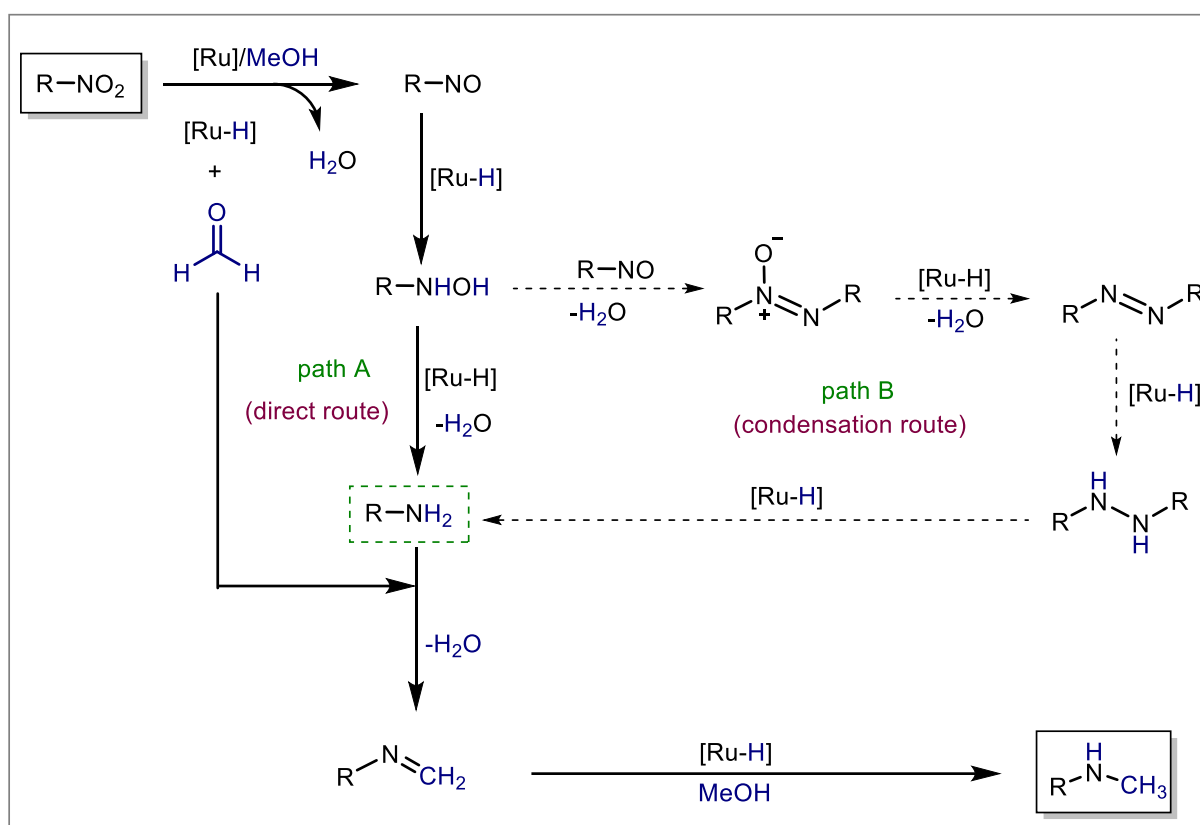

**Supplementary Figure 1**

Proposed mechanism of the ruthenium catalyzed formation of N-methylated amine from nitrocompound using methanol.

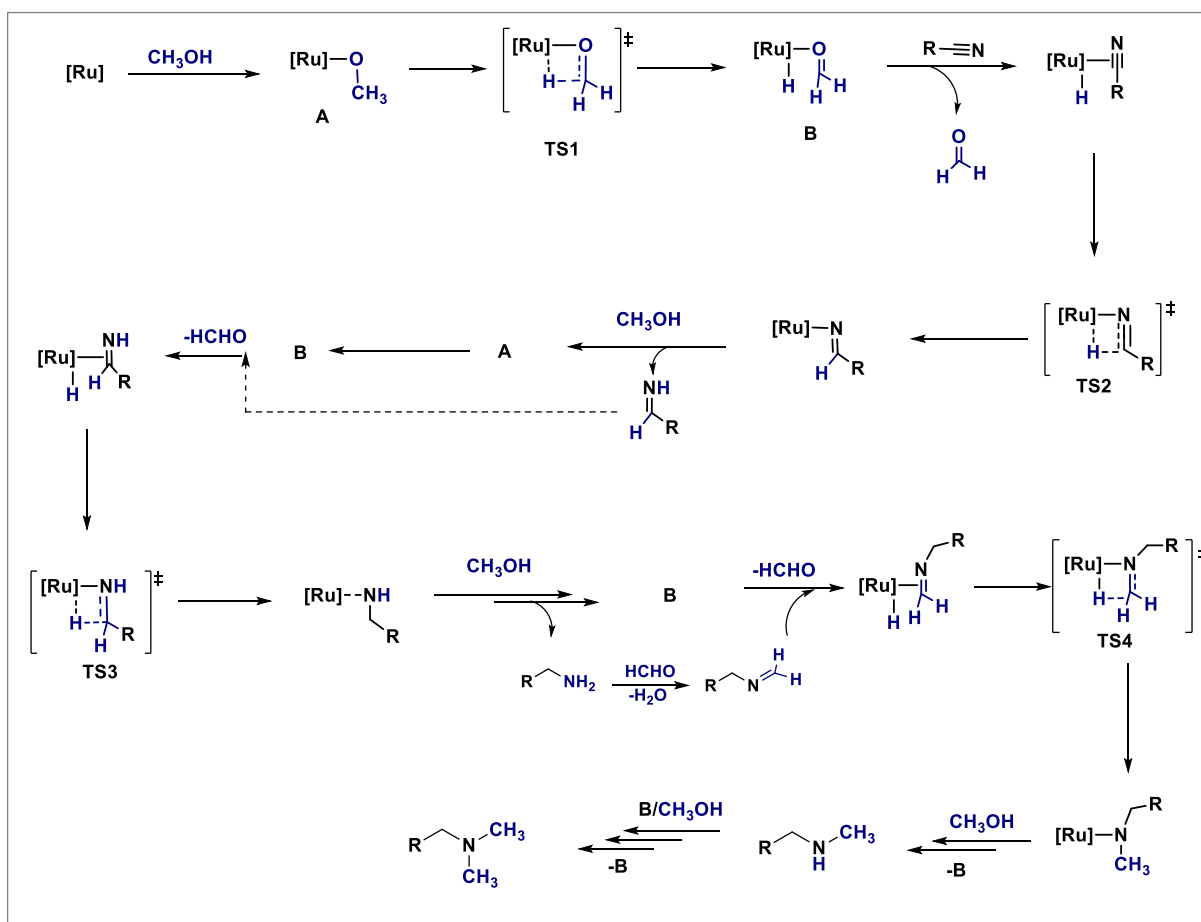

### Supplementary Figure 2

Plausible pathway of the ruthenium catalysed conversion of nitrile to N-methylated amine with methanol.

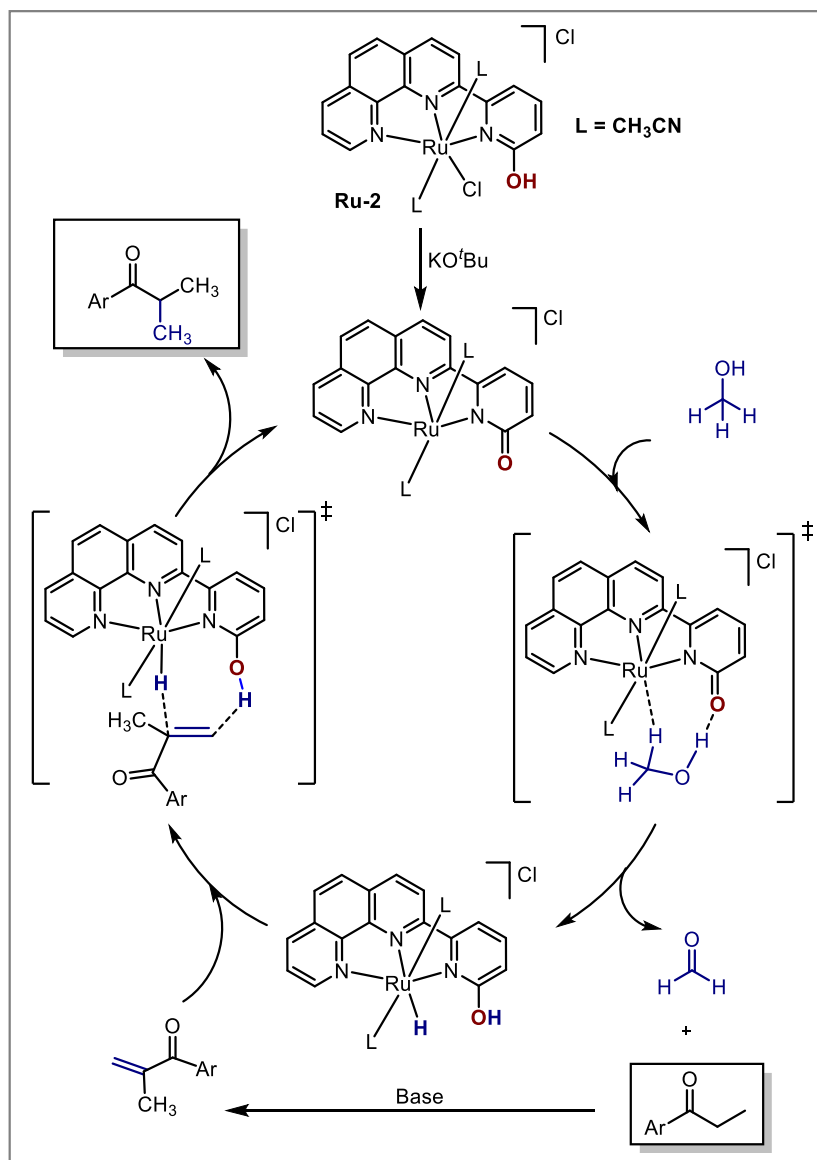

**Supplementary Figure 3**

Proposed mechanism of the  $\alpha$ -methylation of ketone with methanol in presence of a bifunctional ruthenium catalyst.

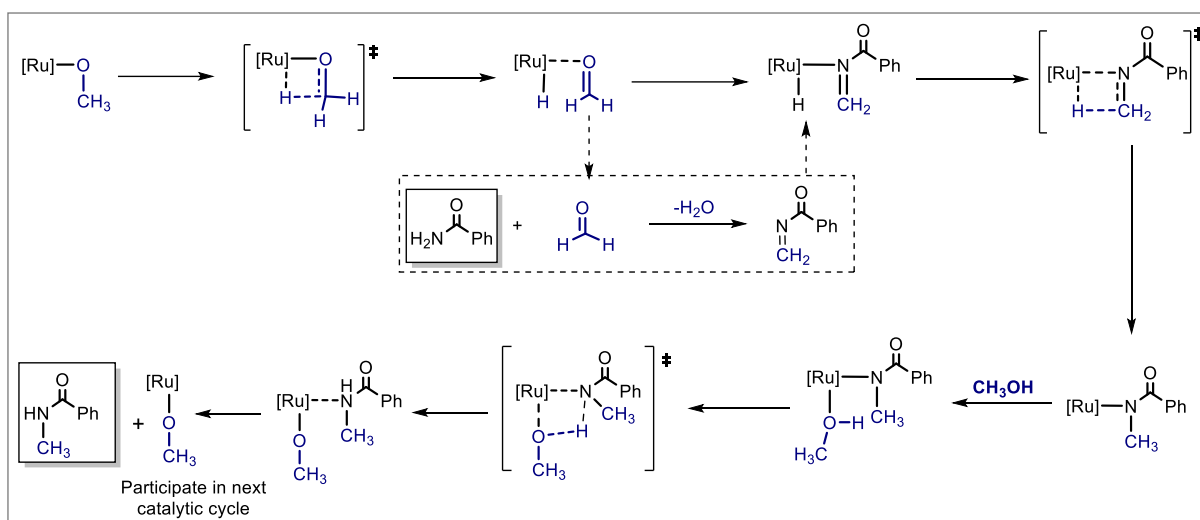

**Supplementary Figure 4**

Plausible pathway of the ruthenium catalysed N-methylation of the amide with methanol.



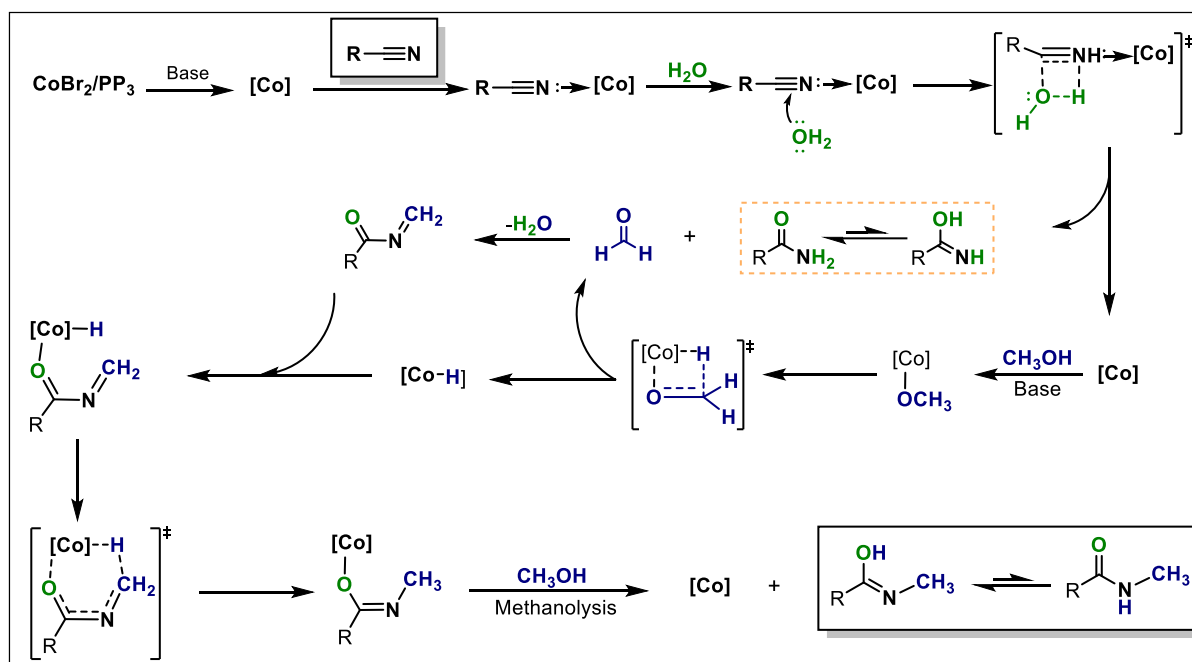

**Supplementary Figure 5**

Proposed mechanism of the cobalt catalysed direct synthesis of N-methylated amide from nitrile using  $\text{CH}_3\text{OH}/\text{H}_2\text{O}$ .

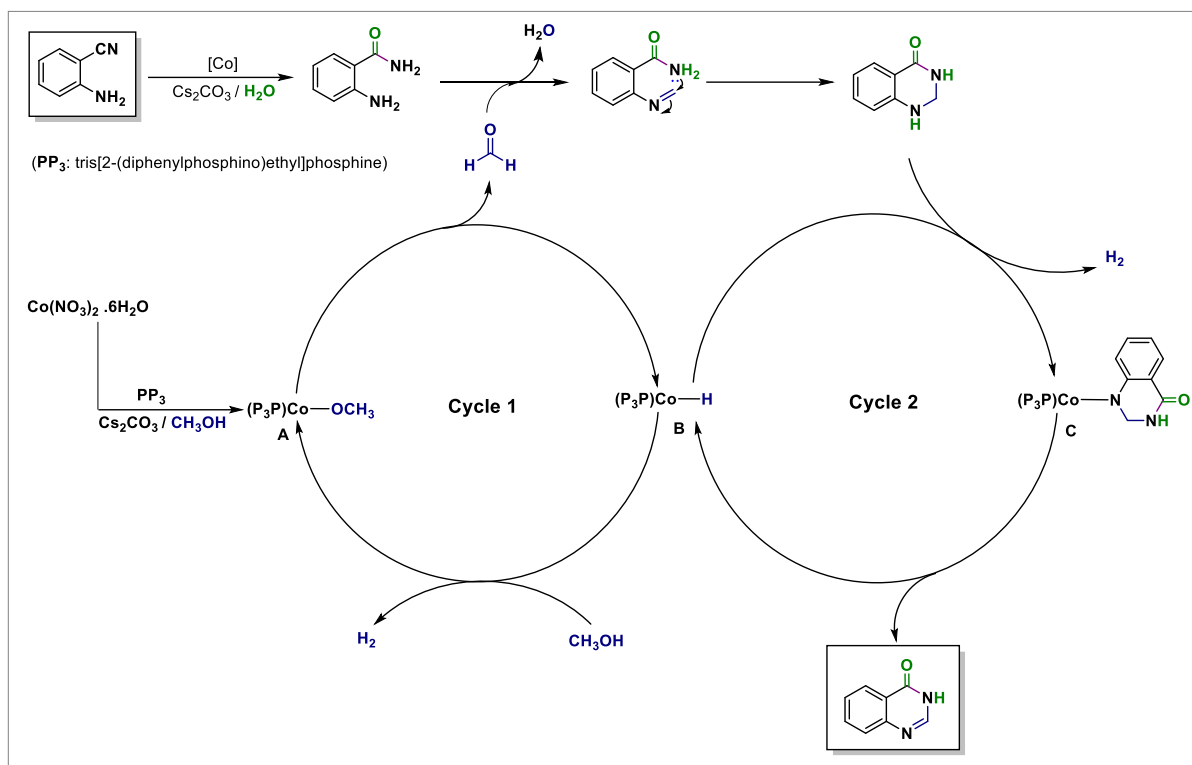

**Supplementary Figure 6**

Proposed mechanism of the cobalt catalysed synthesis of quinazolinone from 2-aminobenzonitrile using CH<sub>3</sub>OH/H<sub>2</sub>O.
